# Supplementary material
Source: publisher figshare collection journal article supplement (https://frontiersin.figshare.com/ndownloader/files/28218594)

**A**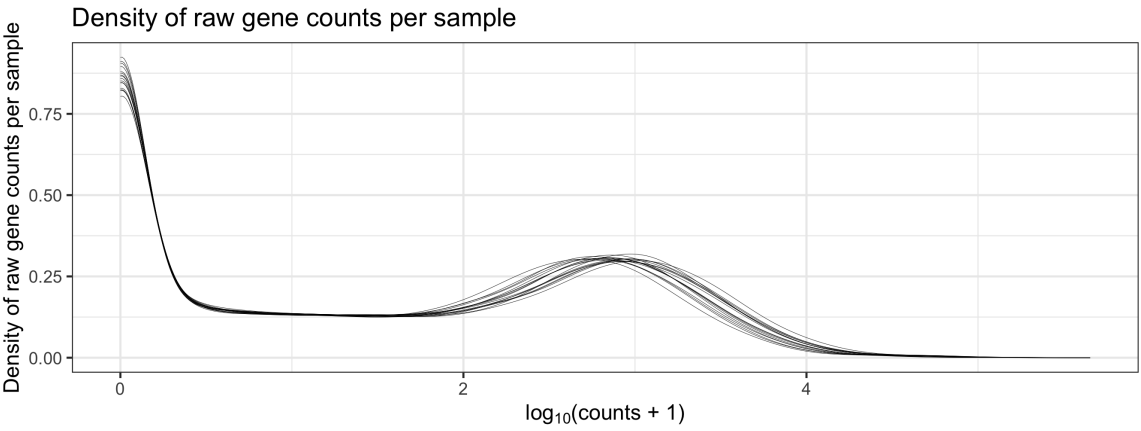**B**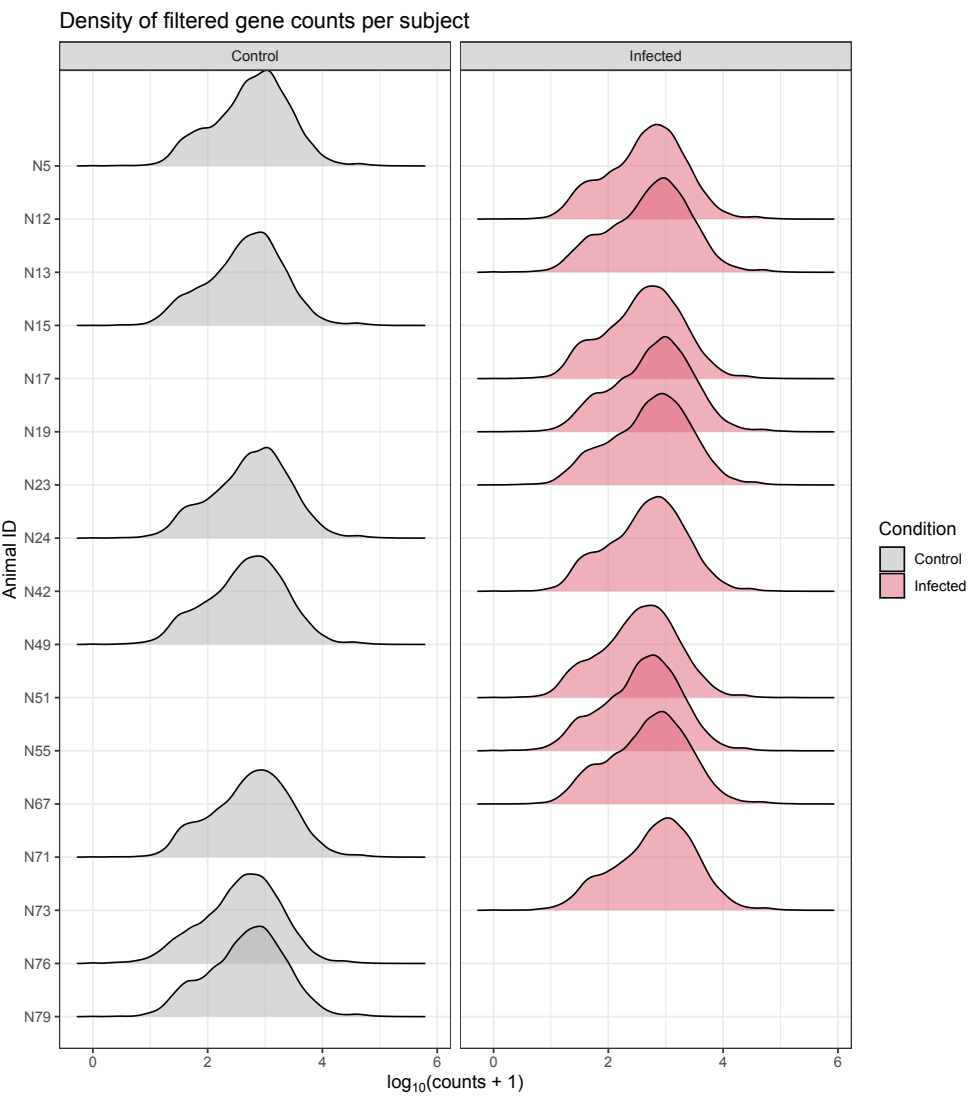

Supplement: Supplementary file [file 28218594]
